# Supplementary material for: A Sensitive Yellow Fever Virus Entry Reporter Identifies Valosin-Containing Protein (VCP/p97) as an Essential Host Factor for Flavivirus Uncoating
Source: PubMed Central journal article supplement (PMC7157815; doi:10.1128/mbio.00467-20), 2020-04-14
Supplement: mBio.00467-20-sf001.pdf [file mBio.00467-20-sf001.pdf]

**Fig.S1 Sequence alignment of human TERA(VCP/p97)with Aedes TER94**

**A.Input Sequences**

>sp|P55072|TERA\_HUMAN Transitional endoplasmic reticulum ATPase OS=Homo sapiens OX=9606 GN=VCP PE=1 SV=4  
MASGADSKGDDLSTAILKQKNRPNRLIVDEAINEDNSVVSLSQPKMDELQLFRGDTVLLKGKKRREAVC  
IVLSDDTCSDEKIRMNRVVRNLRVRLGDVVISIQPCPDVKYGKRIHVLPIDDTVEGITGNLFEVYLKPY  
FLEAYRPIRKGDIFLVRGGMRAVEFKVVETDPSPYCIVAPDVIHCEGEPIKREDEEESLNEVGYYDDIG  
GCRKQLAQIKEMVELPLRHPALFKAIGVKPPRGILLYGPPGTGKTLIARAVANETGAFFFLINGPEIMS  
KLAGESESNLRKAFFEEAEKNAPAIIFIDELDAIAPKREKTHGEVERRIVSQLLTMDGLKQRAHVIVMA  
ATNRPNSIDPALRRFGRFDREVDIGIPDATGRLEILQIHTKNMKLADDVDLEQVANETHGHVGADLAAL  
CSEALQAIRKKMDLIDLEDETIDAEMNSLAVTMDDFRWALSQSNPSALRETVVEVPQVTWEDIGGLE  
DVKRELQELVQYPVEHPDKFLKFGMTPSKGVLFYGPFGCGKTLAKAIANECQANFISIKGPELLTMWF  
GESEANVREIFDKARQAAPCVLFFDELDSIAKARGGNIQGGGAADRVINQILTEMDGMSTKKNVFIIG  
ATNRPDIIDPAILRPGRLDQLIYIPLPDEKSRVAILKANLRKSPVAKVDVLEFLAKMTNGFSGADLTEI  
CQRACKLAIRESIESEIRRERERQTNPSAMEVEEDDPVEIRRDHFEEAMRFARRSVSDNDIRKYEMFA  
QTLQQRGFGSFRFPSPGNQGGAGPSQGSGGGTGGSVYTEDNDDDLYG

>XP\_001654680.1 transitional endoplasmic reticulum ATPase TER94 [Aedes aegypti]  
MAEGKNEDLATAILKRKERNRNLIVDEAGNDDNSVISLSQAKMDELQLFRGDTVLLKGKRRKETVCIVLS  
DDNCPDEKIRMNRVVRNLRVRLGDVVISIQSCPDVKYGKRVHILPIDDTVEGLTGNLFDVYLRPYFLEAY  
RPIHSDDTFIVRGGMRAVEFKVVGADPSPYCIVAPETVIHCEGDPIKREEEEEALNAVGYDDIGGCRKQL  
AQIKEMVELPLRHPSLFKAIGVKPPRGILMYGPPGTGKTLIARAVANETGAFFFLINGPEIMSKLAGESE  
SNLRKAFFEEAEKKS PAIIFIDELDAIAPKREKTHGEVERRIVSQLLTMDGMKSSHVIVMAATNRPNSI  
DPALRRFGRFDREIDIGIPDATGRLEVLRIHSKNMKLADDVDLEQIAAESHGHVGADLASLCSEALQQI  
REKMDLIDLEDDQIDA EVLNLSLAVSMENFRYAMTKSSPSALRETVVEVPNTTWHDIGGLENVKRELQELV  
QYPVEHPDKFLKFGMQPSRGVLFYGPFGCGKTLAKAIANECQANFISVKGPELLTMWFGSEANVRDIF  
DKARSASPCVLFFDELDSIAKSRGGNVGDAGGAADRVINQILTEMDGMGAKKNVFIIGATNRPDIIDPAI  
LRPGRLDQLIYIPLPDDKSREAILKANLRKSPVAGDVLDLYVAKVTQGFSGADLTEICQRACKLAIRQAI  
EAEIRRERERTEGQSSAMDMDEDDPVPNITRAHFEEAMKFARRSVSDNDIRKYEMFAQTLQQRGFGSNF  
RFPGGQSGSSSQGQSSQPTSNPADNGDDDLYS

>XP\_019533679.1 transitional endoplasmic reticulum ATPase TER94 [Aedes albopictus]  
MAEGKNEDLATAILKRKERNRNLIVDEAGNDDNSVISLSQAKMDELQLFRGDTVLLKGKRRKETVCIVLS  
DDNCPDEKIRMNRVVRNLRVRLGDVVISIQSCPDVKYGKRVHILPIDDTVEGLTGNLFDVYLRPYFLEAY  
RPIHSDDTFIVRGGMRAVEFKVVGADPSPYCIVAPETVIHCEGDPIKREEEEEALNAVGYDDIGGCRKQL  
AQIKEMVELPLRHPSLFKAIGVKPPRGILMYGPPGTGKTLIARAVANETGAFFFLINGPEIMSKLAGESE  
SNLRKAFFEEAEKNSPAIIFIDELDAIAPKREKTHGEVERRIVSQLLTMDGMKSSHVIVMAATNRPNSI  
DPALRRFGRFDREIDIGIPDATGRLEVLRIHSKNMKLADDVDLEQIAAESHGHVGADLASLCSEALQQI  
REKMDLIDLEDDQIDA EVLNLSLAVSMENFRYAMTKSSPSALRETVVEVPNTTWHDIGGLENVKRELQELV  
QYPVEHPDKFLKFGMQPSRGVLFYGPFGCGKTLAKAIANECQANFISVKGPELLTMWFGSEANVRDIF  
DKARSASPCVLFFDELDSIAKSRGGNVGDAGGAADRVINQILTEMDGMGAKKNVFIIGATNRPDIIDPAI  
LRPGRLDQLIYIPLPDDKSREAILKANLRKSPVAGDVLDLYVAKVTQGFSGADLTEICQRACKLAIRQAI  
EAEIRRERERTEGQSSAMDMDEDDPVPNITRAHFEEAMKFARRSVSDNDIRKYEMFAQTLQQRGFGNMF  
RFPGGQSGSSSQGQSSQPTSNPADNGDDDLYS

## B. Alignment

CLUSTAL multiple sequence alignment by MUSCLE (3.8)

- Green residues indicate active site residues (K251 and K524 in human VCP/p97)
- Yellow residues indicate allosteric inhibitor binding residues (K615 and N617 in human VCP/p97)

sp|P55072|TERA\_HUMAN MASGADSKGDDLSTAILKQKNRPNRLIVDEAINEDNSVVSLSQPKMDELQLFRGDTVLLK 60  
XP\_001654680.1 ---MAEGKNEIDLATAILKRKERPNRLIVDEAGNDDNSVISLSQAKMDELQLFRGDTVLLK  
XP\_019533679.1 ---MAEGKNEIDLATAILKRKERPNRLIVDEAGNDDNSVISLSQAKMDELQLFRGDTVLLK  
\*:.\*. :\*\*:\* :\*\*\*\*\*:.\*:\*\*\*\*\* \* :\*\*\*\*\*:\*\*\*\*\*.\*\*\*\*\*

sp|P55072|TERA\_HUMAN GKRRREAVCIVLSDDTCSDEKIRMNRVVRNLRVRLGDIVISIQPCPDVKYGKRIHVLPID 120  
XP\_001654680.1 GKRRKETVCIVLSDDNCPDEKIRMNRVVRNLRVRLGDIVSISQPCPDVKYGKRVHILPID  
XP\_019533679.1 GKRRKETVCIVLSDDNCPDEKIRMNRVVRNLRVRLGDIVSISQPCPDVKYGKRVHILPID  
\*\*.\*. :\*\*\*\*\* .\* \*\*\*\*\* :\*\*\*.\*\*\*\*\* :\*:\*\*\*\*\*

sp|P55072|TERA\_HUMAN DTVEGITGNLFEVYLKPYFLEAYRPIRKGDIFLVRGGMRRAVEFKVVDTPSPYCVAPDT 180  
XP\_001654680.1 DTVEGLTGNLFDVYLRPYFLEAYRPIHSDDTFIVRGGMRRAVEFKVVGDPSYCVAPET  
XP\_019533679.1 DTVEGLTGNLFDVYLRPYFLEAYRPIHSDDTFIVRGGMRRAVEFKVVGDPSYCVAPET  
\*\*\*\*\*:\*\*\*\*\*:\*\*\*.\*\*\*\*\*...\* \* :\*\*\*\*\* :\*\*\*\*\*:\*

sp|P55072|TERA\_HUMAN VIHCEGEPIKREDEEESLNEVGYDDIGGCRKQLAQIKEMVELPLRHPLFKAIGVKPPRG 240  
XP\_001654680.1 VIHCEGDPIKREEEEAALNAVGYDDIGGCRKQLAQIKEMVELPLRHPSLFKAIGVKPPRG  
XP\_019533679.1 VIHCEGDPIKREEEEAALNAVGYDDIGGCRKQLAQIKEMVELPLRHPSLFKAIGVKPPRG  
\*\*\*\*\*:\*\*\*\*\*:\*\*\*:\*\*\* \*\*\*\*\*:\*\*\*\*\*:\*\*\*\*\*

sp|P55072|TERA\_HUMAN ILLYGPPGTGKTLIARAVANETGAFFFLINGPEIMSKLAGESESNLKAFEEAEKNAPAI 300  
XP\_001654680.1 ILMYGPPGTGKTLIARAVANETGAFFFLINGPEIMSKLAGESESNLKAFEEAEKNSPAI  
XP\_019533679.1 ILMYGPPGTGKTLIARAVANETGAFFFLINGPEIMSKLAGESESNLKAFEEAEKNSPAI  
\*\*:\* :\*\*\*\*\* \*\*\*\*\*:\*\*\*\*\*:\*\*\*\*\*

sp|P55072|TERA\_HUMAN IFIDELDAIAPKREKTHGEVVERRIVSOLLTMDGLKQRAHVIVMAATNRPN SIDPALRRF 360  
XP\_001654680.1 IFIDELDAIAPKREKTHGEVVERRIVSOLLTMDGMKSSHVIVMAATNRPN SIDPALRRF  
XP\_019533679.1 IFIDELDAIAPKREKTHGEVVERRIVSOLLTMDGMKSSHVIVMAATNRPN SIDPALRRF  
\*\*\*\*\*:\*\*\*\*\*:\*. :\*\*\*\*\*

sp|P55072|TERA\_HUMAN GRFDREVDIGIPDATGRLEILQIHTKNM KLADDVDLEQVANETHGHV GADLAALCSEAL 420  
XP\_001654680.1 GRFDREIDIGIPDATGRLEVLRIHSKNM KLADDVDLEQIAAESHGHV GADLASLCSEAL  
XP\_019533679.1 GRFDREIDIGIPDATGRLEVLRIHSKNM KLADDVDLEQIAAESHGHV GADLASLCSEAL  
\*\*\*\*\*:\*\*\*\*\*:\*. :\*\*\*\*\*:\*\*\*\*\*

sp|P55072|TERA\_HUMAN QAIRKKMDLIDLEDETIDAEVMNSLAVTMDDFRWALSQSNPSALRETVVEVPQVTWEDIG 480  
XP\_001654680.1 QQIREKMDLIDLEDDQIDAEVLNSLAVSMENFRYAMTKSSPSALRETVVEVPNTTWHDIG  
XP\_019533679.1 QQIREKMDLIDLEDDQIDAEVLNSLAVSMENFRYAMTKSSPSALRETVVEVPNTTWHDIG  
\* \*\*:\* :\*\*\*\*\* :\*\*\*\*\*:\*\*\*\*\*:\*. :\*\*\*\*\*:\*\*\*\*\*

```

sp|P55072|TERA_HUMAN      GLEDVKRELQELVQYPVEHPDKFLKFGMTPSKGVLFYGPFGCGK TLLAKAIANECQANFI 540
XP_001654680.1          GLENVKRELQELVQYPVEHPDKFLKFGMQPSRGLVLFYGPFGCGK TLLAKAIANECQANFI
XP_019533679.1          GLENVKRELQELVQYPVEHPDKFLKFGMQPSRGLVLFYGPFGCGK TLLAKAIANECQANFI
***:*****:*****:*****:*****:*****:*****:*****:*****:*****:*****

sp|P55072|TERA_HUMAN      SIKGPELLTMWFGSEANVREIFDKARQAAPCVLFFDELDSIAKARGGNIGDGGGAADRV 600
XP_001654680.1          SVKGPPELLTMWFGSEANVRDIFDKARSASPCVLFDELDIAKSRGGNVGDAGGAADRV
XP_019533679.1          SVKGPPELLTMWFGSEANVRDIFDKARSASPCVLFDELDIAKSRGGNVGDAGGAADRV
*:*****:*****:*****:*****:*****:*****:*****:*****:*****:*****

sp|P55072|TERA_HUMAN      INQILTEMDGMSTKKNVFIIGATNRPDIIDPAILRPGRLDQLIYIPLPDEKSRVAILKAN 660
XP_001654680.1          INQILTEMDGMGAKKNVFIIGATNRPDIIDPAILRPGRLDQLIYIPLPDDKSREAILKAN
XP_019533679.1          INQILTEMDGMGAKKNVFIIGATNRPDIIDPAILRPGRLDQLIYIPLPDDKSREAILKAN
*****:*****:*****:*****:*****:*****:*****:*****:*****:*****

sp|P55072|TERA_HUMAN      LRKSPVAKDVLDFLAKMTNGFSGADLTEICQRACKLAIRESEIESEIRRRERER-QTNPSA 719
XP_001654680.1          LRKSPVAGDVLDTYVAKVTQGFSGADLTEICQRACKLAIRQAIEAEIRRRERERTEGQSSA
XP_019533679.1          LRKSPVAGDVLDTYVAKVTQGFSGADLTEICQRACKLAIRQAIEAEIRRRERERTEGQSSA
***** : : : * * : : * : : * : : * : : * : : * : : * : : * : : * : : * : : *

sp|P55072|TERA_HUMAN      MEVEEDDPVPEIRRDHFEEAMRFARRSVSDNDIRKYEMFAQTLQQSRGFGS-FRFPSTGNQ 778
XP_001654680.1          MDMDEDDPVPNITRAHFEEAMKFARRSVSDNDIRKYEMFAQTLQQSRGFGSNFRFPSTGNQ
XP_019533679.1          MDMDEDDPVPNITRAHFEEAMKFARRSVSDNDIRKYEMFAQTLQQSRGFGNNFRFPSTGNQ
*:*:*****: * * *****.*****:*****:*****:*****:*****:*****:*****

sp|P55072|TERA_HUMAN      GGAGPSQGSQGGGTGGSVYTEDNDDDLYG 806
XP_001654680.1          GSSSQGQGSSQPTSNP--ADNGDDDLYS
XP_019533679.1          GSSSQGQGSSQPTSNP--ADNGDDDLYS
*:. .***. *... ::.*****.

```

**C. Identity Matrix**

Percent Identity Matrix - created by Clustal2.1

|    |                      |        |        |        |
|----|----------------------|--------|--------|--------|
| 1: | sp P55072 TERA_HUMAN | 100.00 | 84.89  | 84.89  |
| 2: | XP_001654680.1       | 84.89  | 100.00 | 99.75  |
| 3: | XP_019533679.1       | 84.89  | 99.75  | 100.00 |
